# Supplementary material
Source: publisher figshare collection journal article supplement (https://frontiersin.figshare.com/ndownloader/files/12660278)
Supplement: Supplementary file [file 12660278]

**Table S9 Prediction performance of polygenic score using different sets of height and BMI associated SNPs.**

| Base Phenotype | Known trait-associated SNP set <sup>a</sup> | N(SNPs) <sup>b</sup> | $R^2$ | Association with disc displacement score <sup>c</sup> |        |            | Association with disc degeneration score <sup>c</sup> |        |                       |
|----------------|---------------------------------------------|----------------------|-------|-------------------------------------------------------|--------|------------|-------------------------------------------------------|--------|-----------------------|
|                |                                             |                      |       | sgn( $\beta$ )                                        | $R^2$  | $p$ -value | sgn( $\beta$ )                                        | $R^2$  | $p$ -value            |
| Height         | European GWAS                               | 622                  | 5.76% | +                                                     | 0.003% | 8.04E-01   | +                                                     | 0.135% | 9.40E-02              |
|                | Asian GWAS                                  | 109                  | 3.87% | -                                                     | 0.013% | 5.99E-01   | -                                                     | 0.018% | 5.46E-01              |
|                | European + Asian GWAS                       | 656                  | 6.99% | -                                                     | 0.012% | 6.24E-01   | +                                                     | 0.001% | 8.83E-01              |
| BMI            | European GWAS                               | 92                   | 1.24% | +                                                     | 0.016% | 5.64E-01   | +                                                     | 0.053% | 2.94E-01              |
|                | Asian GWAS                                  | 30                   | 1.01% | +                                                     | 0.122% | 1.10E-01   | +                                                     | 0.330% | 8.67E-03 <sup>d</sup> |
|                | European + Asian GWAS                       | 101                  | 1.63% | +                                                     | 0.030% | 4.26E-01   | +                                                     | 0.112% | 1.26E-01              |

a. Known trait associated SNPs were collected from following references: European GWAS of Height (N=253K; Wood AR et al. 2014. Nat Genet. 46:1173-86), Asian GWAS of Height (Combined Stage I+II N=94K; He M et al. 2015. Hum Mol Genet. 2015. 24:1791-800), European GWAS of BMI (N=234K~322K; Locke AE 2015. Nature. 518:197-206), and Asian GWAS of BMI (Stage I N=87K, Stage II N=5~47K; Wen W et al. 2014. Hum Mol Genet 23:5492-504). Different studies may report different SNPs at the same loci. We applied following procedures to combine results from different studies. When merging between GWAS and the exome-chip study, for each GWAS SNP if there was at least one exome-chip SNP located within 1Mb, it was replaced by the nearest exome-chip SNP. Similarly, when merging European and Asian studies, we replaced each European SNP with the nearest Asian SNP within 1Mb distance.

- b. Number of SNPs in the HKDD cohort that passed QC and have minor allele frequency  $\geq 0.01$ .
- c. Association with disc herniation and degeneration scores are evaluated by linear regression adjusting for age, sex and previous spine injury.
- d. The association of Asian BMI PGS with disc degeneration score was driven by one SNP rs16858082. Whether or not it represents a pleiotropic locus needs further replication.
